# Supplementary material for: A theoretical study of the photochemistry of indigo in its neutral and dianionic (leucoindigo) forms
Source: Royal Society of Chemistry journal article supplement (doi:10.1039/c3cp52763h), 2013-01-01
Supplement: c3cp52763h.pdf [file c3cp52763h.pdf]

## ELECTRONIC SUPPORTING INFORMATION

### A THEORETICAL STUDY OF THE PHOTOCHEMISTRY OF INDIGO IN ITS NEUTRAL AND DIANIONIC (LEUCOINDIGO) FORMS.

Miquel Moreno,<sup>\*[a]</sup> Juan Manuel Ortiz-Sánchez,<sup>[b]</sup> Ricard Gelabert,<sup>[a]</sup> and José M. Lluch<sup>[a,c]</sup>

[a] *Departament de Química. Universitat Autònoma de Barcelona, 08193 Bellaterra, Barcelona (Spain)*

[b] *Institut für Physikalische u. Theoretische Chemie. Goethe-Universität, Max-von-Laue-Str. 9, 60438 Frankfurt am Main*

[c] *Institut de Biotecnologia i de Biomedicina. Universitat Autònoma de Barcelona, 08193 Bellaterra, Barcelona (Spain)*

#### SUMMARY OF DATA:

- Figures of the results obtained for indigo in continuous phase (DMF) ..... 2
- Figures of the results obtained for leucoindigo in continuous phase (Water) ... 3
- Cartesian geometries of all the stationary points and Conical Intersections located in this paper (gas phase results only) ..... 6

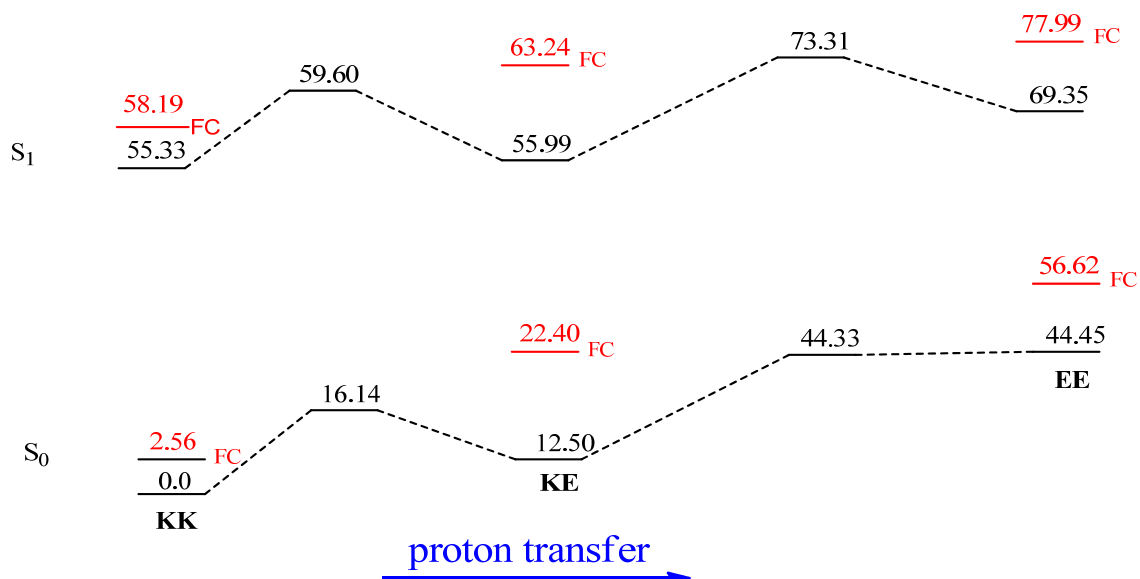

**Figure 1S.** Energies corresponding to the proton transfer reactions in the ground ( $S_0$ ) and first singlet excited ( $S_1$ ) electronic states of neutral indigo in DMF. Energies relative to the KK minimum in  $S_0$  are reported in kcal/mol. Red lines and values indicate the energies of the Franck-Condon (FC) structures obtained by calculating the energy in a given electronic state using the optimized geometry of the other state (see main text for details).

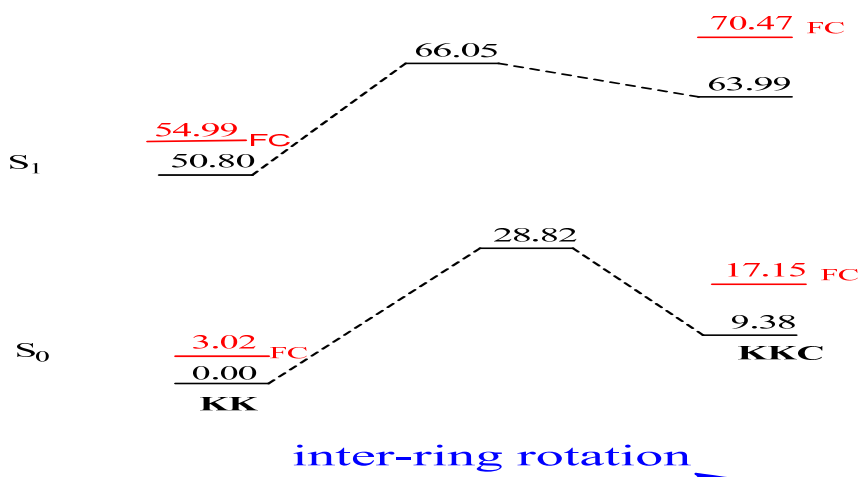

**Figure 2S.** Energies corresponding to the internal rotation along the C-C inter-ring bond of the KK tautomer in the ground ( $S_0$ ) and first singlet excited ( $S_1$ ) electronic states of neutral indigo in DMF. Energies relative to the KK minimum in  $S_0$  are reported in kcal/mol. Red lines and values indicate the energies of the Franck-Condon (FC) structures obtained by calculating the energy in a given electronic state using the optimized geometry of the other state (see main text for details).

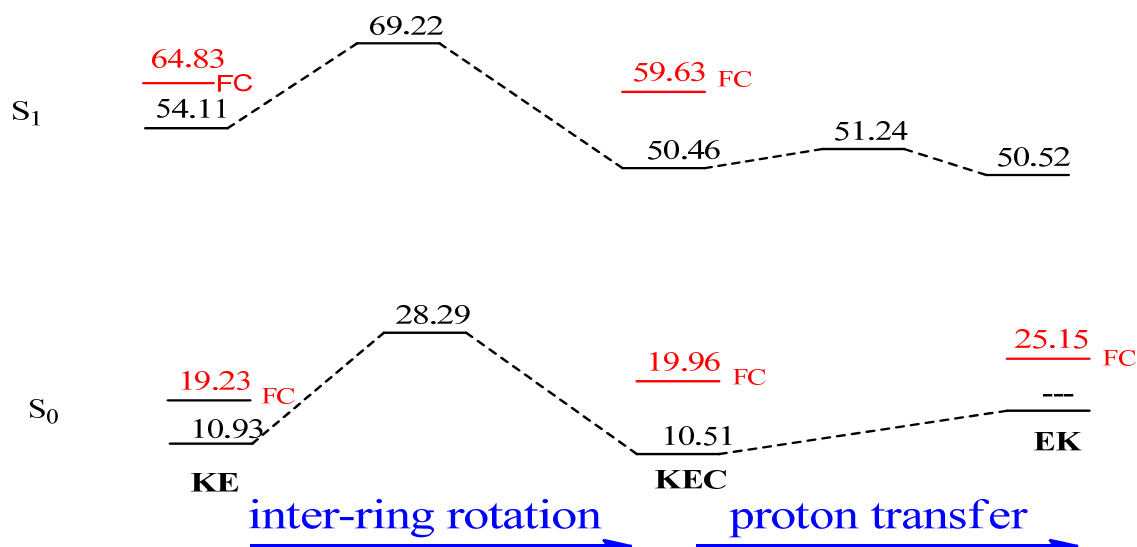

**Figure 3S.** Energies corresponding to the internal rotation along the C-C inter-ring bond of the KE tautomer and the following proton transfer reaction along the O-H...O direction in the ground ( $S_0$ ) and first singlet excited ( $S_1$ ) electronic states of neutral indigo in DMF. Energies relative to the KK minimum in  $S_0$  are reported in kcal/mol. Red lines and values indicate the energies of the Franck-Condon (FC) structures obtained by calculating the energy in a given electronic state using the optimized geometry of the other state (see main text for details).

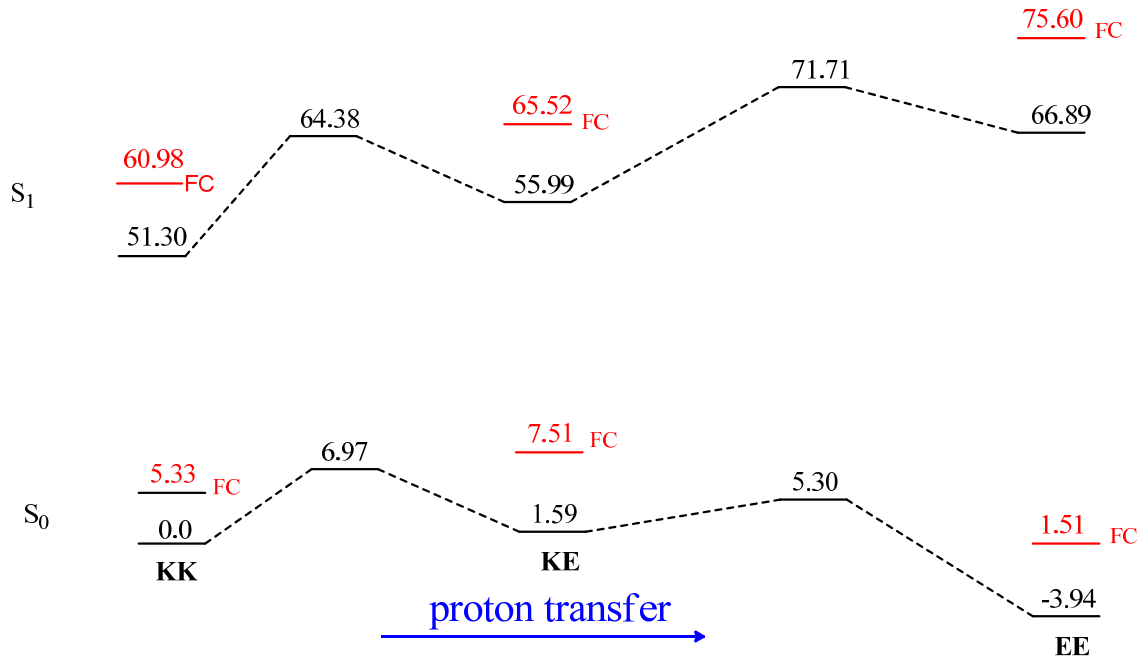

**Figure 4S.** Energies corresponding to the proton transfer reactions in the ground ( $S_0$ ) and first singlet excited ( $S_1$ ) electronic states of leucoindigo in water. Energies relative to the KK minimum in  $S_0$  are reported in kcal/mol. Red lines and values indicate the energies of the Franck-Condon (FC) structures obtained by calculating the energy in a given electronic state using the optimized geometry of the other state (see main text for details).

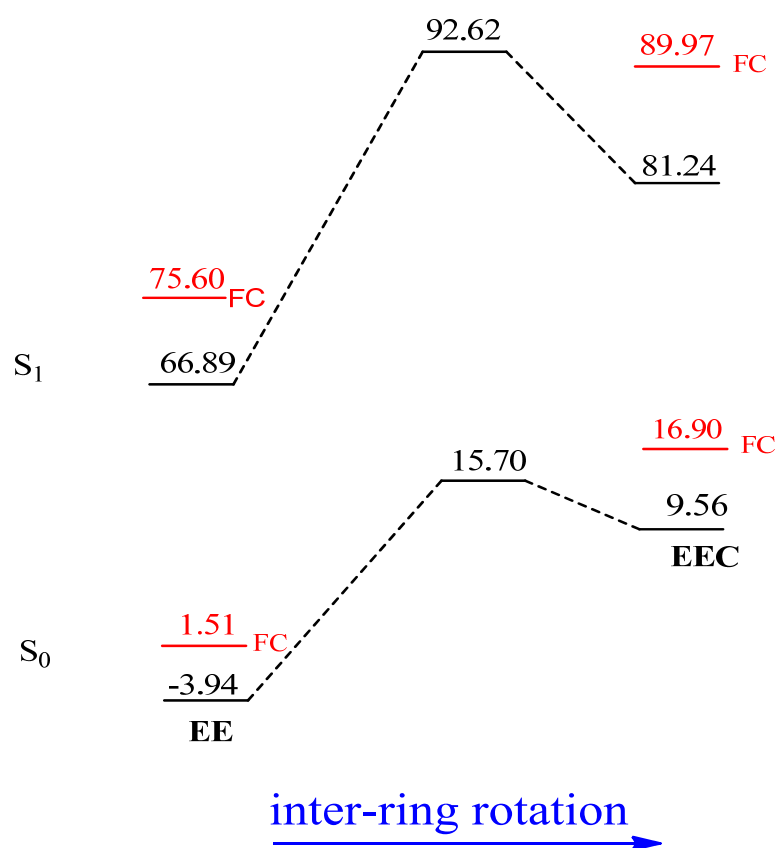

**Figure 5S.** Energies corresponding to the internal rotation along the C-C inter-ring bond of the EE tautomer in the ground ( $S_0$ ) and first singlet excited ( $S_1$ ) electronic states of leucoindigo in water. Energies relative to the KK minimum in  $S_0$  are reported in kcal/mol. Red lines and values indicate the energies of the Franck-Condon (FC) structures obtained by calculating the energy in a given electronic state using the optimized geometry of the other state (see main text for details).

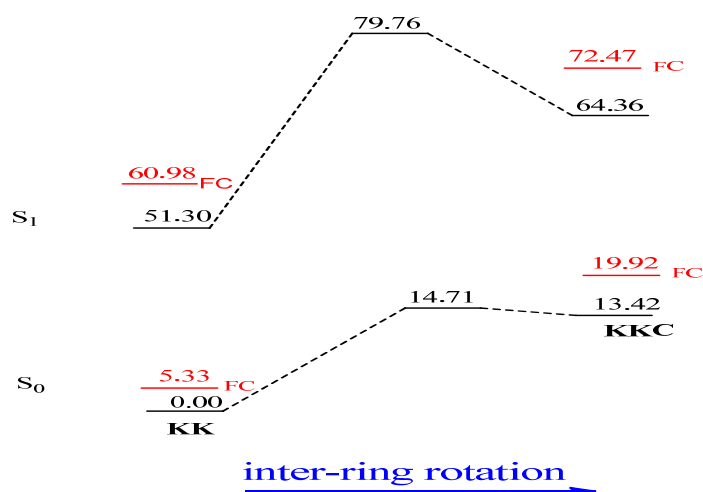

**Figure 6S.** Energies corresponding to the internal rotation along the C-C inter-ring bond of the KK tautomer in the ground ( $S_0$ ) and first singlet excited ( $S_1$ ) electronic states of leucoindigo in water. Energies relative to the KK minimum in  $S_0$  are reported in kcal/mol. Red lines and values indicate the energies of the Franck-Condon (FC) structures obtained by calculating the energy in a given electronic state using the optimized geometry of the other state (see main text for details).

structures obtained by calculating the energy in a given electronic state using the optimized geometry of the other state (see main text for details).

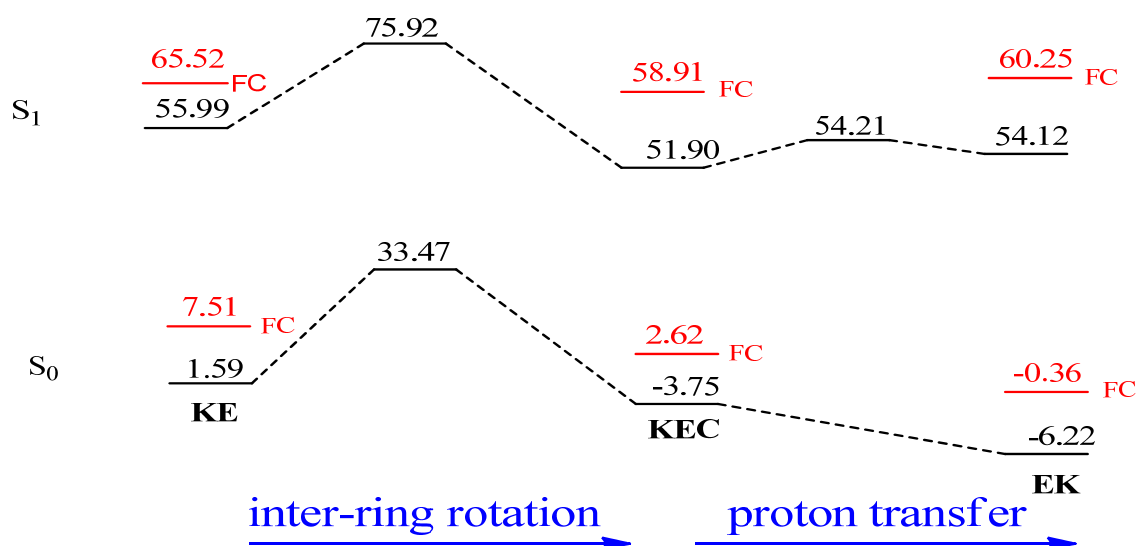

**Figure 7S.** Energies corresponding to the internal rotation along the C-C inter-ring bond of the KE tautomer and the following proton transfer reaction along the O-H...O direction in the ground (S<sub>0</sub>) and first singlet excited (S<sub>1</sub>) electronic states of leucoindigo in water. Energies relative to the KK minimum in S<sub>0</sub> are reported in kcal/mol. Red lines and values indicate the energies of the Franck-Condon (FC) structures obtained by calculating the energy in a given electronic state using the optimized geometry of the other state (see main text for details).

## CARTESIAN GEOMETRIES OF THE STATIONARY AND CONICAL INTERSECTION POINTS FOR THE INDIGO IN GAS PHASE:

### GROUND STATE

#### KK

|   |           |           |           |
|---|-----------|-----------|-----------|
| 6 | 2.231085  | 0.105215  | -3.397079 |
| 6 | 2.246045  | 0.063659  | -1.990811 |
| 6 | 3.443779  | 0.071848  | -1.287107 |
| 6 | 4.632282  | 0.121953  | -2.000168 |
| 6 | 4.607099  | 0.162981  | -3.399254 |
| 6 | 3.418602  | 0.155570  | -4.119117 |
| 7 | 0.926586  | 0.087634  | -3.859501 |
| 6 | 0.055304  | 0.034299  | -2.791605 |
| 6 | 0.852730  | 0.016001  | -1.535840 |
| 1 | 3.430958  | 0.039212  | -0.202705 |
| 1 | 5.583014  | 0.129537  | -1.479463 |
| 1 | 5.545888  | 0.201946  | -3.942860 |
| 1 | 3.418815  | 0.187884  | -5.203027 |
| 6 | -3.481743 | -0.029939 | -3.659570 |
| 6 | -3.466856 | -0.070616 | -2.253280 |
| 6 | -4.654376 | -0.122055 | -1.531325 |
| 6 | -5.842796 | -0.131400 | -2.251297 |
| 6 | -5.867901 | -0.091135 | -3.650408 |
| 6 | -4.679392 | -0.039927 | -4.363383 |
| 6 | -2.088414 | 0.018753  | -4.114449 |
| 6 | -1.291088 | 0.002672  | -2.858581 |
| 7 | -2.162420 | -0.050513 | -1.790726 |
| 1 | -4.654646 | -0.153710 | -0.447395 |
| 1 | -6.781583 | -0.171298 | -1.707755 |
| 1 | -6.818570 | -0.100213 | -4.171203 |
| 1 | -4.666506 | -0.007934 | -5.447806 |
| 8 | -1.616329 | 0.063672  | -5.243978 |
| 8 | 0.380795  | -0.029220 | -0.406361 |
| 1 | 0.599097  | 0.106350  | -4.814541 |
| 1 | -1.834843 | -0.071475 | -0.835751 |

#### KE

|   |           |           |           |
|---|-----------|-----------|-----------|
| 6 | 2.231085  | 0.105215  | -3.397079 |
| 6 | 2.246045  | 0.063659  | -1.990811 |
| 6 | 3.443779  | 0.071848  | -1.287107 |
| 6 | 4.632282  | 0.121953  | -2.000168 |
| 6 | 4.607099  | 0.162981  | -3.399254 |
| 6 | 3.418602  | 0.155570  | -4.119117 |
| 7 | 0.926586  | 0.087634  | -3.859501 |
| 6 | 0.055304  | 0.034299  | -2.791605 |
| 6 | 0.852730  | 0.016001  | -1.535840 |
| 1 | 3.430958  | 0.039212  | -0.202705 |
| 1 | 5.583014  | 0.129537  | -1.479463 |
| 1 | 5.545888  | 0.201946  | -3.942860 |
| 1 | 3.418815  | 0.187884  | -5.203027 |
| 6 | -3.481743 | -0.029939 | -3.659570 |
| 6 | -3.466856 | -0.070616 | -2.253280 |
| 6 | -4.654376 | -0.122055 | -1.531325 |
| 6 | -5.842796 | -0.131400 | -2.251297 |
| 6 | -5.867901 | -0.091135 | -3.650408 |
| 6 | -4.679392 | -0.039927 | -4.363383 |
| 6 | -2.088414 | 0.018753  | -4.114449 |
| 6 | -1.291088 | 0.002672  | -2.858581 |

|   |           |           |           |
|---|-----------|-----------|-----------|
| 7 | -2.162420 | -0.050513 | -1.790726 |
| 1 | -4.654646 | -0.153710 | -0.447395 |
| 1 | -6.781583 | -0.171298 | -1.707755 |
| 1 | -6.818570 | -0.100213 | -4.171203 |
| 1 | -4.666506 | -0.007934 | -5.447806 |
| 8 | -1.616329 | 0.063672  | -5.243978 |
| 8 | 0.380795  | -0.029220 | -0.406361 |
| 1 | 0.599097  | 0.106350  | -4.814541 |
| 1 | -1.834843 | -0.071475 | -0.835751 |

### EE

|   |           |           |           |
|---|-----------|-----------|-----------|
| 6 | 2.123418  | 0.096786  | -3.419356 |
| 6 | 2.174556  | 0.049519  | -1.973102 |
| 6 | 3.407270  | 0.056935  | -1.277956 |
| 6 | 4.563151  | 0.110126  | -2.004996 |
| 6 | 4.514183  | 0.156627  | -3.427610 |
| 6 | 3.336979  | 0.151004  | -4.134492 |
| 7 | 0.862721  | 0.082155  | -3.924157 |
| 6 | 0.072586  | 0.025821  | -2.824257 |
| 6 | 0.840348  | 0.003006  | -1.578701 |
| 1 | 3.419961  | 0.020926  | -0.193750 |
| 1 | 5.526458  | 0.117486  | -1.508220 |
| 1 | 5.452376  | 0.198286  | -3.973060 |
| 1 | 3.323981  | 0.186981  | -5.217632 |
| 6 | -3.393347 | -0.032062 | -3.673413 |
| 6 | -3.342391 | -0.079269 | -2.227141 |
| 6 | -4.556048 | -0.133760 | -1.512245 |
| 6 | -5.733152 | -0.139695 | -2.219351 |
| 6 | -5.781913 | -0.093213 | -3.641926 |
| 6 | -4.625902 | -0.039749 | -4.368785 |
| 6 | -2.059070 | 0.014624  | -4.067598 |
| 6 | -1.291501 | -0.008141 | -2.821921 |
| 7 | -2.081759 | -0.064413 | -1.722124 |
| 1 | -4.543305 | -0.169693 | -0.429102 |
| 1 | -6.671400 | -0.181578 | -1.674011 |
| 1 | -6.745118 | -0.100766 | -4.138901 |
| 1 | -4.638455 | -0.003682 | -5.452989 |
| 8 | -1.493646 | 0.068151  | -5.243740 |
| 1 | -0.496580 | 0.087917  | -5.097273 |
| 8 | 0.275095  | -0.050458 | -0.402455 |
| 1 | -0.721850 | -0.070117 | -0.548876 |

### KKC

|   |           |           |           |
|---|-----------|-----------|-----------|
| 6 | 2.008489  | 0.083310  | -1.516889 |
| 6 | 2.390356  | 0.007308  | -2.855678 |
| 6 | 3.728364  | 0.012162  | -3.221408 |
| 6 | 4.685723  | 0.110078  | -2.220160 |
| 6 | 4.293002  | 0.202401  | -0.881671 |
| 6 | 2.953418  | 0.188161  | -0.505657 |
| 7 | 0.613831  | 0.013176  | -1.406676 |
| 6 | 0.044277  | 0.020511  | -2.689254 |
| 6 | 1.170571  | -0.045926 | -3.689224 |
| 1 | 3.999204  | -0.050395 | -4.270112 |
| 1 | 5.740329  | 0.118839  | -2.471681 |
| 1 | 5.052911  | 0.283653  | -0.110946 |
| 1 | 2.663599  | 0.252176  | 0.537829  |
| 6 | -3.510617 | 0.056293  | -3.650152 |



|   |           |           |           |
|---|-----------|-----------|-----------|
| 6 | -3.496124 | -0.108354 | -2.265726 |
| 6 | -4.674091 | -0.269434 | -1.549539 |
| 6 | -5.866179 | -0.248083 | -2.266856 |
| 6 | -5.891357 | -0.067075 | -3.652825 |
| 6 | -4.703988 | 0.086340  | -4.356557 |
| 6 | -2.114201 | 0.152146  | -4.125907 |
| 6 | -1.292259 | 0.012268  | -2.869827 |
| 7 | -2.181049 | -0.057424 | -1.786013 |
| 1 | -4.670293 | -0.402463 | -0.472857 |
| 1 | -6.802271 | -0.371845 | -1.731604 |
| 1 | -6.841647 | -0.050664 | -4.174567 |
| 1 | -4.688091 | 0.218085  | -5.433330 |
| 8 | -1.727161 | 0.330690  | -5.258943 |
| 8 | 1.098818  | -0.148396 | -4.893300 |
| 1 | 0.147499  | 0.520240  | -0.666824 |
| 1 | -1.922852 | -0.614732 | -0.983079 |

### KEC

|   |           |           |           |
|---|-----------|-----------|-----------|
| 6 | 0.027025  | -0.006634 | -0.029312 |
| 6 | 0.006727  | -0.006794 | 1.369873  |
| 6 | 1.207710  | 0.002080  | 2.116414  |
| 6 | 2.448033  | 0.011291  | 1.463784  |
| 6 | 2.465199  | 0.011427  | 0.086107  |
| 6 | 1.260844  | 0.002500  | -0.647939 |
| 6 | 0.839339  | -0.000684 | 3.495795  |
| 6 | -0.556744 | -0.011068 | 3.549767  |
| 7 | -1.039588 | -0.014469 | 2.243192  |
| 6 | -1.464108 | -0.017990 | 4.636316  |
| 7 | -2.757239 | -0.027675 | 4.498084  |
| 6 | -3.308574 | -0.032087 | 5.803098  |
| 6 | -2.333497 | -0.024919 | 6.812348  |
| 6 | -1.050805 | -0.014987 | 6.111188  |
| 6 | -2.661856 | -0.027738 | 8.156056  |
| 6 | -4.014172 | -0.038018 | 8.493889  |
| 6 | -4.984665 | -0.045112 | 7.492511  |
| 6 | -4.650315 | -0.042287 | 6.135573  |
| 8 | 0.084905  | -0.006603 | 6.560452  |
| 8 | 1.726577  | 0.005914  | 4.483981  |
| 1 | 3.365253  | 0.018099  | 2.042338  |
| 1 | 3.410289  | 0.018444  | -0.445476 |
| 1 | 1.306050  | 0.002836  | -1.732330 |
| 1 | -0.892419 | -0.013435 | -0.604683 |
| 1 | -5.411046 | -0.047872 | 5.363609  |
| 1 | -6.032748 | -0.053093 | 7.775233  |
| 1 | -4.314861 | -0.040512 | 9.535487  |
| 1 | -1.886591 | -0.022036 | 8.915365  |
| 1 | -2.025012 | -0.022365 | 2.037019  |
| 1 | 1.257533  | 0.002350  | 5.352071  |

### FIRST SINGLET EXCITED ELECTRONIC STATE

#### KK

|   |          |          |           |
|---|----------|----------|-----------|
| 6 | 2.230119 | 0.104340 | -3.382678 |
| 6 | 2.232463 | 0.062456 | -1.967363 |
| 6 | 3.435944 | 0.071862 | -1.281320 |
| 6 | 4.622137 | 0.122857 | -2.012007 |
| 6 | 4.604235 | 0.163883 | -3.410478 |

|   |           |           |           |
|---|-----------|-----------|-----------|
| 6 | 3.406573  | 0.155291  | -4.119424 |
| 7 | 0.921419  | 0.084994  | -3.821284 |
| 6 | 0.066007  | 0.032079  | -2.751803 |
| 6 | 0.834348  | 0.014421  | -1.513359 |
| 1 | 3.441461  | 0.039852  | -0.197088 |
| 1 | 5.574030  | 0.130980  | -1.492122 |
| 1 | 5.541400  | 0.203203  | -3.955094 |
| 1 | 3.392320  | 0.187080  | -5.203584 |
| 6 | -3.468155 | -0.029046 | -3.683054 |
| 6 | -3.465826 | -0.070535 | -2.267729 |
| 6 | -4.642276 | -0.121713 | -1.530994 |
| 6 | -5.839918 | -0.131025 | -2.239966 |
| 6 | -5.857804 | -0.090449 | -3.638451 |
| 6 | -4.671615 | -0.039188 | -4.369125 |
| 6 | -2.070050 | 0.019426  | -4.137041 |
| 6 | -1.301726 | 0.002318  | -2.898576 |
| 7 | -2.157144 | -0.050503 | -1.829096 |
| 1 | -4.628036 | -0.153172 | -0.446825 |
| 1 | -6.777080 | -0.170567 | -1.695360 |
| 1 | -6.809681 | -0.099125 | -4.158355 |
| 1 | -4.677119 | -0.007513 | -5.453367 |
| 8 | -1.592354 | 0.064818  | -5.281372 |
| 8 | 0.356671  | -0.031500 | -0.369041 |
| 1 | 0.553098  | 0.103670  | -4.770668 |
| 1 | -1.788822 | -0.069444 | -0.879719 |

### KE

|   |           |           |           |
|---|-----------|-----------|-----------|
| 6 | 2.236482  | 0.106006  | -3.429720 |
| 6 | 2.188514  | 0.051807  | -2.008414 |
| 6 | 3.377244  | 0.053993  | -1.259872 |
| 6 | 4.577226  | 0.109423  | -1.931903 |
| 6 | 4.610629  | 0.162818  | -3.341504 |
| 6 | 3.458616  | 0.162077  | -4.103981 |
| 7 | 0.960105  | 0.091835  | -3.917237 |
| 6 | 0.077988  | 0.029918  | -2.855441 |
| 6 | 0.815711  | 0.003976  | -1.656441 |
| 1 | 3.336563  | 0.012602  | -0.176956 |
| 1 | 5.509882  | 0.112424  | -1.378941 |
| 1 | 5.572344  | 0.205848  | -3.842605 |
| 1 | 3.498705  | 0.203458  | -5.186847 |
| 6 | -3.446112 | -0.027234 | -3.717135 |
| 6 | -3.358041 | -0.078899 | -2.275575 |
| 6 | -4.531527 | -0.138145 | -1.487668 |
| 6 | -5.743677 | -0.144681 | -2.135562 |
| 6 | -5.820636 | -0.093767 | -3.549666 |
| 6 | -4.680333 | -0.035164 | -4.343073 |
| 6 | -2.068422 | 0.026041  | -4.206517 |
| 6 | -1.305205 | -0.000639 | -2.975657 |
| 7 | -2.089755 | -0.063041 | -1.839486 |
| 1 | -4.454635 | -0.176613 | -0.406853 |
| 1 | -6.662541 | -0.189480 | -1.561158 |
| 1 | -6.799164 | -0.101070 | -4.018596 |
| 1 | -4.747439 | 0.003579  | -5.424855 |
| 8 | -1.607922 | 0.080901  | -5.364502 |
| 8 | 0.304561  | -0.054415 | -0.434587 |
| 1 | -0.678688 | -0.075331 | -0.536736 |
| 1 | 0.623804  | 0.119082  | -4.872041 |

### EE

|   |           |           |           |
|---|-----------|-----------|-----------|
| 6 | 2.183478  | 0.098069  | -3.413564 |
| 6 | 2.190073  | 0.050237  | -1.982313 |
| 6 | 3.391175  | 0.055900  | -1.255411 |
| 6 | 4.577362  | 0.109080  | -1.956219 |
| 6 | 4.569723  | 0.156109  | -3.364250 |
| 6 | 3.393399  | 0.151354  | -4.100028 |
| 7 | 0.903187  | 0.083859  | -3.945158 |
| 6 | 0.098937  | 0.028338  | -2.887782 |
| 6 | 0.829652  | 0.004228  | -1.626292 |
| 1 | 3.377784  | 0.019190  | -0.171153 |
| 1 | 5.523552  | 0.114994  | -1.426970 |
| 1 | 5.518433  | 0.197489  | -3.890531 |
| 1 | 3.404581  | 0.187964  | -5.183434 |
| 6 | -3.425842 | -0.032466 | -3.692449 |
| 6 | -3.365850 | -0.079287 | -2.250845 |
| 6 | -4.555836 | -0.134544 | -1.487204 |
| 6 | -5.761392 | -0.142199 | -2.154978 |
| 6 | -5.803602 | -0.096102 | -3.561207 |
| 6 | -4.642090 | -0.041040 | -4.340318 |
| 6 | -2.042102 | 0.016329  | -4.117861 |
| 6 | -1.301014 | -0.003650 | -2.973769 |
| 7 | -2.110303 | -0.063012 | -1.802238 |
| 1 | -4.498769 | -0.169395 | -0.404984 |
| 1 | -6.690501 | -0.184012 | -1.598114 |
| 1 | -6.768477 | -0.103503 | -4.057400 |
| 1 | -4.702385 | -0.006257 | -5.422401 |
| 8 | -1.577726 | 0.069845  | -5.365361 |
| 1 | -0.593258 | 0.092032  | -5.292048 |
| 8 | 0.289160  | -0.049538 | -0.428767 |
| 1 | -0.693700 | -0.070262 | -0.546090 |

### KKC

|   |           |           |           |
|---|-----------|-----------|-----------|
| 6 | 2.063421  | 0.089272  | -1.434832 |
| 6 | 2.282158  | 0.044998  | -2.822257 |
| 6 | 3.575965  | 0.058171  | -3.339717 |
| 6 | 4.637351  | 0.136139  | -2.453157 |
| 6 | 4.409056  | 0.197930  | -1.071883 |
| 6 | 3.125629  | 0.172788  | -0.542790 |
| 7 | 0.698927  | 0.017458  | -1.177759 |
| 6 | 0.019502  | 0.023247  | -2.399187 |
| 6 | 0.973805  | 0.010466  | -3.461559 |
| 1 | 3.734046  | 0.017323  | -4.411610 |
| 1 | 5.654987  | 0.152974  | -2.827344 |
| 1 | 5.255903  | 0.262745  | -0.396531 |
| 1 | 2.959978  | 0.210797  | 0.528802  |
| 6 | -3.414803 | 0.015603  | -3.591761 |
| 6 | -3.570765 | -0.119087 | -2.201693 |
| 6 | -4.830456 | -0.250236 | -1.629874 |
| 6 | -5.927777 | -0.230448 | -2.480314 |
| 6 | -5.782813 | -0.078585 | -3.865875 |
| 6 | -4.525318 | 0.046684  | -4.432992 |
| 6 | -1.984239 | 0.079592  | -3.858364 |
| 6 | -1.345127 | -0.009235 | -2.584339 |
| 7 | -2.323666 | -0.075617 | -1.588551 |
| 1 | -4.954056 | -0.358041 | -0.557356 |
| 1 | -6.922599 | -0.330953 | -2.058794 |
| 1 | -6.664912 | -0.062697 | -4.496376 |

|   |           |           |           |
|---|-----------|-----------|-----------|
| 1 | -4.394362 | 0.157277  | -5.503614 |
| 8 | -1.428165 | 0.207452  | -4.985965 |
| 8 | 0.737181  | -0.040300 | -4.701915 |
| 1 | 0.299792  | 0.460609  | -0.363811 |
| 1 | -2.150431 | -0.573279 | -0.728014 |

### KEC

|   |           |           |           |
|---|-----------|-----------|-----------|
| 6 | 0.036325  | -0.006576 | -0.020099 |
| 6 | -0.002616 | -0.006999 | 1.376062  |
| 6 | 1.192089  | 0.001874  | 2.135717  |
| 6 | 2.440788  | 0.011269  | 1.499638  |
| 6 | 2.476775  | 0.011681  | 0.122116  |
| 6 | 1.280397  | 0.002799  | -0.623022 |
| 6 | 0.815219  | -0.001047 | 3.513494  |
| 6 | -0.614037 | -0.011800 | 3.542517  |
| 7 | -1.070283 | -0.015096 | 2.229932  |
| 6 | -1.441041 | -0.018083 | 4.652471  |
| 7 | -2.836965 | -0.028413 | 4.509759  |
| 6 | -3.315488 | -0.032171 | 5.749602  |
| 6 | -2.274668 | -0.024497 | 6.755768  |
| 6 | -1.027617 | -0.015010 | 6.028783  |
| 6 | -2.592670 | -0.027085 | 8.105040  |
| 6 | -3.935446 | -0.037225 | 8.459097  |
| 6 | -4.967996 | -0.044842 | 7.483368  |
| 6 | -4.680442 | -0.042491 | 6.141883  |
| 8 | 0.161832  | -0.006104 | 6.487919  |
| 8 | 1.618412  | 0.004863  | 4.526856  |
| 1 | 3.348566  | 0.018014  | 2.092958  |
| 1 | 3.427505  | 0.018856  | -0.398817 |
| 1 | 1.337262  | 0.003335  | -1.706952 |
| 1 | -0.874494 | -0.013341 | -0.608742 |
| 1 | -5.455920 | -0.048203 | 5.384391  |
| 1 | -6.000563 | -0.052640 | 7.815088  |
| 1 | -4.211568 | -0.039450 | 9.508342  |
| 1 | -1.810512 | -0.021314 | 8.856126  |
| 1 | -2.049720 | -0.022308 | 1.997390  |
| 1 | 1.048118  | 0.000566  | 5.453126  |

### EK

|   |           |           |           |
|---|-----------|-----------|-----------|
| 6 | -0.017362 | 0.000116  | -0.042857 |
| 6 | -0.055288 | 0.000204  | 1.371557  |
| 6 | 1.169497  | 0.000081  | 2.126093  |
| 6 | 2.396233  | -0.000110 | 1.489982  |
| 6 | 2.406054  | -0.000186 | 0.094686  |
| 6 | 1.213914  | -0.000074 | -0.661049 |
| 6 | 0.762808  | 0.000251  | 3.509927  |
| 6 | -0.630845 | 0.000333  | 3.489204  |
| 7 | -1.132156 | 0.000367  | 2.154437  |
| 6 | -1.519929 | 0.000474  | 4.558150  |
| 6 | -1.197191 | 0.000613  | 5.980143  |
| 6 | -2.484269 | 0.000760  | 6.659245  |
| 6 | -3.486684 | 0.000715  | 5.670955  |
| 7 | -2.886936 | 0.000537  | 4.424449  |
| 6 | -2.821566 | 0.000930  | 8.010007  |
| 6 | -4.162846 | 0.001052  | 8.357568  |
| 6 | -5.151132 | 0.001004  | 7.363466  |
| 6 | -4.834197 | 0.000836  | 6.011060  |

|   |           |           |           |
|---|-----------|-----------|-----------|
| 8 | -0.051214 | 0.000624  | 6.483530  |
| 8 | 1.591929  | 0.000281  | 4.528938  |
| 1 | -2.038734 | 0.000965  | 8.760895  |
| 1 | -4.454987 | 0.001186  | 9.401672  |
| 1 | -6.196061 | 0.001104  | 7.656739  |
| 1 | -5.609820 | 0.000803  | 5.252860  |
| 1 | -0.944119 | 0.000198  | -0.605402 |
| 1 | 1.276903  | -0.000141 | -1.743513 |
| 1 | 3.357078  | -0.000331 | -0.427440 |
| 1 | 3.320837  | -0.000184 | 2.056457  |
| 1 | -3.344539 | 0.000550  | 3.527396  |
| 1 | 1.047769  | 0.000404  | 5.391453  |

### CONICAL INTERSECTIONS

#### CI<sub>SPT</sub>

|   |           |           |           |
|---|-----------|-----------|-----------|
| 7 | 0.062481  | 0.006967  | 0.051181  |
| 6 | 0.073497  | 0.008173  | 1.303003  |
| 6 | 1.461427  | 0.002917  | 1.886754  |
| 6 | 2.409904  | -0.002499 | 0.797411  |
| 6 | 1.593443  | 0.000056  | -0.313461 |
| 6 | -1.077020 | 0.014305  | 2.231576  |
| 6 | -0.829267 | 0.014543  | 3.536436  |
| 6 | 0.546360  | 0.008998  | 4.074269  |
| 6 | 1.645025  | 0.003546  | 3.273363  |
| 8 | 3.691543  | -0.008440 | 0.829475  |
| 6 | 1.923126  | -0.003107 | -1.634071 |
| 7 | 3.231789  | -0.010042 | -2.102589 |
| 6 | 3.222914  | -0.011762 | -3.463111 |
| 6 | 1.879792  | -0.005404 | -3.910004 |
| 6 | 1.067312  | -0.000001 | -2.757026 |
| 6 | 1.583531  | -0.005436 | -5.283681 |
| 6 | 2.622944  | -0.011854 | -6.174743 |
| 6 | 3.961041  | -0.018211 | -5.715174 |
| 6 | 4.280257  | -0.018246 | -4.378356 |
| 8 | -0.266344 | 0.007118  | -2.760367 |
| 1 | 0.562962  | -0.000616 | -5.611613 |
| 1 | 2.432653  | -0.012127 | -7.229365 |
| 1 | 4.753144  | -0.023092 | -6.439043 |
| 1 | 5.298951  | -0.023011 | -4.046278 |
| 1 | -2.066429 | 0.018202  | 1.821901  |
| 1 | -1.634599 | 0.018705  | 4.244272  |
| 1 | 0.658058  | 0.009555  | 5.140709  |
| 1 | 2.638210  | -0.000263 | 3.674555  |
| 1 | -0.647854 | 0.009664  | -1.874717 |
| 1 | 4.002115  | -0.012715 | -1.469492 |

#### CI<sub>IRI</sub>

|   |          |           |           |
|---|----------|-----------|-----------|
| 6 | 2.272492 | 0.641852  | -3.244661 |
| 6 | 2.263967 | -0.270651 | -2.182286 |
| 6 | 3.442955 | -0.672242 | -1.582670 |
| 6 | 4.630230 | -0.135448 | -2.071303 |
| 6 | 4.616496 | 0.768398  | -3.125074 |
| 6 | 3.426242 | 1.179149  | -3.739041 |
| 7 | 0.912628 | 0.854032  | -3.651288 |
| 6 | 0.067387 | 0.165264  | -2.943099 |
| 6 | 0.886759 | -0.593398 | -1.968907 |

|   |           |           |           |
|---|-----------|-----------|-----------|
| 1 | 3.437790  | -1.372632 | -0.772297 |
| 1 | 5.563681  | -0.422584 | -1.633076 |
| 1 | 5.544491  | 1.165606  | -3.484497 |
| 1 | 3.433665  | 1.874659  | -4.552677 |
| 6 | -3.457719 | -0.535572 | -3.404247 |
| 6 | -3.413484 | 0.588920  | -2.555313 |
| 6 | -4.609466 | 1.158146  | -2.078877 |
| 6 | -5.798472 | 0.593335  | -2.462059 |
| 6 | -5.840700 | -0.533970 | -3.313965 |
| 6 | -4.678164 | -1.097152 | -3.784119 |
| 6 | -2.075296 | -0.887737 | -3.719188 |
| 6 | -1.372017 | 0.094165  | -3.026476 |
| 7 | -2.125803 | 0.995676  | -2.296209 |
| 1 | -4.574705 | 2.015180  | -1.434256 |
| 1 | -6.723133 | 1.013221  | -2.110777 |
| 1 | -6.792661 | -0.946293 | -3.591067 |
| 1 | -4.695865 | -1.952618 | -4.432422 |
| 8 | -1.593323 | -1.859492 | -4.406357 |
| 8 | 0.376397  | -1.405123 | -1.117286 |
| 1 | -0.583541 | -1.510277 | -1.160869 |
| 1 | 0.613449  | 1.444898  | -4.395167 |

### CI<sub>IR2</sub>

|   |           |           |           |
|---|-----------|-----------|-----------|
| 7 | -0.264993 | -0.186155 | 0.000804  |
| 6 | -0.104497 | 0.038528  | 1.373641  |
| 6 | 1.209950  | -0.209278 | 1.761528  |
| 6 | 1.970680  | -0.609557 | 0.565045  |
| 6 | 1.010921  | -0.737867 | -0.458641 |
| 6 | -1.064933 | 0.417854  | 2.306138  |
| 6 | -0.659657 | 0.581225  | 3.619535  |
| 6 | 0.666420  | 0.366421  | 4.009844  |
| 6 | 1.608819  | -0.030492 | 3.076902  |
| 8 | 3.222529  | -0.713584 | 0.440084  |
| 6 | 1.495211  | -0.308457 | -1.735214 |
| 7 | 1.606843  | -1.046640 | -2.780381 |
| 6 | 2.200865  | -0.407698 | -3.927778 |
| 6 | 2.492644  | 0.904060  | -3.583625 |
| 6 | 2.063545  | 1.093890  | -2.183822 |
| 6 | 3.079147  | 1.748411  | -4.496465 |
| 6 | 3.364385  | 1.240124  | -5.766901 |
| 6 | 3.063592  | -0.073213 | -6.088591 |
| 6 | 2.466461  | -0.935264 | -5.159507 |
| 8 | 2.076254  | 2.071116  | -1.493542 |
| 1 | 3.312498  | 2.761765  | -4.237182 |
| 1 | 3.823478  | 1.872366  | -6.499887 |
| 1 | 3.292860  | -0.443048 | -7.068055 |
| 1 | 2.239323  | -1.951467 | -5.412109 |
| 1 | -2.081883 | 0.599399  | 2.014678  |
| 1 | -1.379235 | 0.888360  | 4.355219  |
| 1 | 0.946587  | 0.509230  | 5.035578  |
| 1 | 2.630192  | -0.207487 | 3.352894  |
| 1 | -1.089947 | -0.682239 | -0.257559 |
| 1 | 1.343458  | -2.008398 | -2.733719 |

## CARTESIAN GEOMETRIES OF THE STATIONARY AND CONICAL INTERSECTION POINTS FOR LEUCOINDIGO IN GAS PHASE:

### GROUND STATE

#### KK

|   |           |           |           |
|---|-----------|-----------|-----------|
| 6 | 2.215598  | 0.105254  | -3.421701 |
| 6 | 2.198735  | 0.062518  | -1.981173 |
| 6 | 3.420539  | 0.072662  | -1.300943 |
| 6 | 4.616717  | 0.122792  | -2.006145 |
| 6 | 4.615881  | 0.164087  | -3.413572 |
| 6 | 3.417940  | 0.155552  | -4.125929 |
| 7 | 0.926305  | 0.086019  | -3.843589 |
| 6 | 0.083414  | 0.032606  | -2.729760 |
| 6 | 0.815394  | 0.015064  | -1.527304 |
| 1 | 3.410076  | 0.040474  | -0.213280 |
| 1 | 5.565820  | 0.130433  | -1.470916 |
| 1 | 5.560349  | 0.203153  | -3.954379 |
| 1 | 3.417930  | 0.187468  | -5.214307 |
| 6 | -3.434137 | -0.029039 | -3.669172 |
| 6 | -3.451561 | -0.070982 | -2.228610 |
| 6 | -4.654013 | -0.121744 | -1.524709 |
| 6 | -5.851766 | -0.131612 | -2.237409 |
| 6 | -5.852118 | -0.091063 | -3.644860 |
| 6 | -4.655799 | -0.040393 | -4.349748 |
| 6 | -2.050750 | 0.019027  | -4.122480 |
| 6 | -1.319145 | 0.003097  | -2.919743 |
| 7 | -2.162381 | -0.050425 | -1.806271 |
| 1 | -4.654269 | -0.153170 | -0.436313 |
| 1 | -6.796370 | -0.171208 | -1.696895 |
| 1 | -6.801035 | -0.099709 | -4.180412 |
| 1 | -4.645122 | -0.008768 | -5.437423 |
| 8 | -1.587344 | 0.065461  | -5.326926 |
| 8 | 0.352552  | -0.031623 | -0.322716 |
| 1 | 0.493422  | 0.101171  | -4.765093 |
| 1 | -1.730246 | -0.067352 | -0.884563 |

#### KE

|   |           |           |           |
|---|-----------|-----------|-----------|
| 6 | 2.206594  | 0.102482  | -3.409686 |
| 6 | 2.213825  | 0.051933  | -1.961265 |
| 6 | 3.461625  | 0.060442  | -1.307998 |
| 6 | 4.633132  | 0.116087  | -2.054309 |
| 6 | 4.607807  | 0.164527  | -3.454553 |
| 6 | 3.384437  | 0.157628  | -4.137192 |
| 7 | 0.899833  | 0.083491  | -3.814071 |
| 6 | 0.077985  | 0.024348  | -2.704033 |
| 6 | 0.864074  | 0.003974  | -1.558323 |
| 1 | 3.500766  | 0.023413  | -0.222250 |
| 1 | 5.593243  | 0.122192  | -1.538832 |
| 1 | 5.538770  | 0.207603  | -4.015799 |
| 1 | 3.352635  | 0.194839  | -5.224119 |
| 6 | -3.391584 | -0.029562 | -3.660614 |
| 6 | -3.383675 | -0.079857 | -2.204988 |
| 6 | -4.629889 | -0.134359 | -1.533502 |
| 6 | -5.806648 | -0.138664 | -2.259304 |
| 6 | -5.806717 | -0.089561 | -3.674946 |
| 6 | -4.598384 | -0.035574 | -4.358571 |
| 6 | -2.001344 | 0.019581  | -4.073630 |

|   |           |           |           |
|---|-----------|-----------|-----------|
| 6 | -1.323754 | -0.006622 | -2.826482 |
| 7 | -2.144978 | -0.066507 | -1.694747 |
| 1 | -4.646553 | -0.172542 | -0.444521 |
| 1 | -6.760006 | -0.180917 | -1.729712 |
| 1 | -6.751790 | -0.094431 | -4.217280 |
| 1 | -4.576462 | 0.002763  | -5.448044 |
| 8 | -1.472965 | 0.073756  | -5.251341 |
| 8 | 0.337191  | -0.053629 | -0.288472 |
| 1 | -0.640782 | -0.072461 | -0.448948 |
| 1 | 0.417895  | 0.102933  | -4.721998 |

### EE

|   |           |           |           |
|---|-----------|-----------|-----------|
| 6 | 2.171762  | 0.097876  | -3.421710 |
| 6 | 2.199215  | 0.050192  | -1.966677 |
| 6 | 3.431926  | 0.058729  | -1.294315 |
| 6 | 4.612769  | 0.112445  | -2.019320 |
| 6 | 4.589434  | 0.158761  | -3.430290 |
| 6 | 3.386887  | 0.151635  | -4.122955 |
| 7 | 0.907044  | 0.082199  | -3.902555 |
| 6 | 0.111866  | 0.024840  | -2.779387 |
| 6 | 0.839007  | 0.003700  | -1.594508 |
| 1 | 3.456636  | 0.023168  | -0.206056 |
| 1 | 5.569738  | 0.119107  | -1.497846 |
| 1 | 5.529294  | 0.200628  | -3.980500 |
| 1 | 3.368565  | 0.187366  | -5.211311 |
| 6 | -3.418028 | -0.032807 | -3.679923 |
| 6 | -3.390593 | -0.080886 | -2.224914 |
| 6 | -4.605735 | -0.134594 | -1.523683 |
| 6 | -5.808276 | -0.141317 | -2.216348 |
| 6 | -5.831597 | -0.094605 | -3.627319 |
| 6 | -4.650745 | -0.040910 | -4.352295 |
| 6 | -2.057814 | 0.013426  | -4.052096 |
| 6 | -1.330702 | -0.008231 | -2.867192 |
| 7 | -2.125886 | -0.065426 | -1.744040 |
| 1 | -4.587408 | -0.170579 | -0.435335 |
| 1 | -6.748151 | -0.183143 | -1.666161 |
| 1 | -6.788568 | -0.100948 | -4.148791 |
| 1 | -4.675433 | -0.005069 | -5.440547 |
| 8 | -1.513743 | 0.069256  | -5.315446 |
| 1 | -0.540311 | 0.087584  | -5.145127 |
| 8 | 0.294945  | -0.051969 | -0.331119 |
| 1 | -0.678447 | -0.070675 | -0.501374 |

### EEC

|   |            |            |             |
|---|------------|------------|-------------|
| 6 | 2.17176200 | 0.09787600 | -3.42171000 |
| 6 | 2.19921500 | 0.05019200 | -1.96667700 |
| 6 | 3.43192600 | 0.05872900 | -1.29431500 |
| 6 | 4.61276900 | 0.11244500 | -2.01932000 |
| 6 | 4.58943400 | 0.15876100 | -3.43029000 |
| 6 | 3.38688700 | 0.15163500 | -4.12295500 |
| 7 | 0.90704400 | 0.08219900 | -3.90255500 |
| 6 | 0.11186600 | 0.02484000 | -2.77938700 |
| 6 | 0.83900700 | 0.00370000 | -1.59450800 |
| 1 | 3.45663600 | 0.02316800 | -0.20605600 |
| 1 | 5.56973800 | 0.11910700 | -1.49784600 |
| 1 | 5.52929400 | 0.20062800 | -3.98050000 |
| 1 | 3.36856500 | 0.18736600 | -5.21131100 |



|   |             |             |             |
|---|-------------|-------------|-------------|
| 6 | -3.50008221 | -0.08133602 | -2.31355796 |
| 6 | -3.29870021 | -0.02780864 | -3.75463241 |
| 6 | -4.42105510 | -0.02757982 | -4.59813641 |
| 6 | -5.69773525 | -0.07777960 | -4.05637757 |
| 6 | -5.88976213 | -0.12962510 | -2.65852108 |
| 6 | -4.80428726 | -0.13147551 | -1.79560412 |
| 6 | -2.19433107 | -0.06651499 | -1.77911747 |
| 6 | -1.33070200 | -0.00823100 | -2.86719200 |
| 7 | -1.98565177 | 0.01588298  | -4.07860382 |
| 1 | -4.27259810 | 0.01238038  | -5.67632742 |
| 1 | -6.56490899 | -0.07729563 | -4.71655151 |
| 1 | -6.90217215 | -0.16849495 | -2.25692196 |
| 1 | -4.95904661 | -0.17158195 | -0.71827988 |
| 8 | -1.80543554 | -0.10113750 | -0.45898679 |
| 1 | -2.66268337 | -0.13915861 | 0.03151793  |
| 8 | 0.29494500  | -0.05196900 | -0.33111900 |
| 1 | -0.67844700 | -0.07067500 | -0.50137400 |

### KKC

|   |           |           |           |
|---|-----------|-----------|-----------|
| 6 | 1.933629  | 0.248320  | -1.566784 |
| 6 | 2.396602  | -0.110620 | -2.857375 |
| 6 | 3.767799  | -0.259691 | -3.064681 |
| 6 | 4.657218  | -0.015656 | -2.023141 |
| 6 | 4.185360  | 0.373175  | -0.757855 |
| 6 | 2.814720  | 0.500488  | -0.520507 |
| 7 | 0.562295  | 0.242326  | -1.605228 |
| 6 | 0.127501  | 0.021039  | -2.964207 |
| 6 | 1.257184  | -0.273797 | -3.778699 |
| 1 | 4.108377  | -0.550604 | -4.055831 |
| 1 | 5.729964  | -0.119197 | -2.184143 |
| 1 | 4.891057  | 0.573794  | 0.046808  |
| 1 | 2.444930  | 0.788074  | 0.463472  |
| 6 | -3.517203 | 0.174123  | -3.645908 |
| 6 | -3.409310 | -0.270499 | -2.304462 |
| 6 | -4.533729 | -0.581360 | -1.547063 |
| 6 | -5.793690 | -0.427314 | -2.130130 |
| 6 | -5.917106 | 0.045599  | -3.447669 |
| 6 | -4.785841 | 0.347970  | -4.198825 |
| 6 | -2.175994 | 0.385960  | -4.220381 |
| 6 | -1.299722 | 0.029979  | -3.156457 |
| 7 | -2.076823 | -0.273897 | -1.978064 |
| 1 | -4.435141 | -0.934387 | -0.520751 |
| 1 | -6.685463 | -0.672815 | -1.555494 |
| 1 | -6.909816 | 0.168473  | -3.879938 |
| 1 | -4.854390 | 0.704523  | -5.224092 |
| 8 | -1.971918 | 0.828663  | -5.387337 |
| 8 | 1.373126  | -0.639232 | -4.983868 |
| 1 | 0.032732  | 0.898133  | -1.047605 |
| 1 | -1.708136 | -0.968523 | -1.343218 |

### KEC

|   |          |           |           |
|---|----------|-----------|-----------|
| 6 | 0.025349 | -0.006422 | -0.009051 |
| 6 | 0.006967 | -0.007475 | 1.378411  |
| 6 | 1.219942 | 0.001318  | 2.152711  |
| 6 | 2.443938 | 0.011096  | 1.461851  |
| 6 | 2.454479 | 0.012197  | 0.073323  |
| 6 | 1.259620 | 0.003574  | -0.665164 |
| 6 | 0.857816 | -0.002359 | 3.529327  |

|   |           |           |           |
|---|-----------|-----------|-----------|
| 6 | -0.535872 | -0.013027 | 3.573813  |
| 7 | -1.024926 | -0.016338 | 2.271092  |
| 6 | -1.439248 | -0.019492 | 4.679740  |
| 7 | -2.816524 | -0.030172 | 4.473279  |
| 6 | -3.322158 | -0.033029 | 5.715541  |
| 6 | -2.287936 | -0.024286 | 6.739907  |
| 6 | -1.040140 | -0.015192 | 6.034518  |
| 6 | -2.637364 | -0.025821 | 8.094018  |
| 6 | -3.973008 | -0.035725 | 8.469729  |
| 6 | -4.985924 | -0.044303 | 7.478323  |
| 6 | -4.674126 | -0.043035 | 6.130227  |
| 8 | 0.182428  | -0.005023 | 6.524953  |
| 8 | 1.696030  | 0.003070  | 4.578119  |
| 1 | 3.372198  | 0.017803  | 2.026872  |
| 1 | 3.406471  | 0.019887  | -0.456326 |
| 1 | 1.291864  | 0.004648  | -1.752699 |
| 1 | -0.905523 | -0.013217 | -0.573583 |
| 1 | -5.461439 | -0.049684 | 5.376157  |
| 1 | -6.032536 | -0.052049 | 7.787195  |
| 1 | -4.249789 | -0.036970 | 9.523966  |
| 1 | -1.848668 | -0.019143 | 8.846292  |
| 1 | -2.021096 | -0.022156 | 2.120208  |
| 1 | 1.060422  | -0.000114 | 5.487056  |

### EKA

|   |           |           |           |
|---|-----------|-----------|-----------|
| 6 | -0.001961 | -0.006791 | -0.015848 |
| 6 | 0.006096  | -0.006992 | 1.378638  |
| 6 | 1.236382  | 0.002228  | 2.116326  |
| 6 | 2.440413  | 0.011455  | 1.407773  |
| 6 | 2.432334  | 0.011653  | 0.018324  |
| 6 | 1.216378  | 0.002583  | -0.690210 |
| 6 | 0.929453  | -0.000244 | 3.536739  |
| 6 | -0.471446 | -0.010918 | 3.587894  |
| 7 | -0.998326 | -0.014966 | 2.289315  |
| 6 | -1.387015 | -0.017867 | 4.701093  |
| 7 | -2.750384 | -0.028171 | 4.478646  |
| 6 | -3.289272 | -0.032189 | 5.715671  |
| 6 | -2.271285 | -0.024491 | 6.755175  |
| 6 | -1.042415 | -0.015273 | 6.057753  |
| 6 | -2.652200 | -0.027454 | 8.106219  |
| 6 | -3.997861 | -0.037635 | 8.444225  |
| 6 | -4.990618 | -0.045081 | 7.438529  |
| 6 | -4.643372 | -0.042410 | 6.094394  |
| 8 | 0.204692  | -0.005793 | 6.611555  |
| 8 | 1.781848  | 0.006138  | 4.516824  |
| 1 | 3.373303  | 0.018430  | 1.966682  |
| 1 | 3.371930  | 0.018877  | -0.532349 |
| 1 | 1.225318  | 0.002857  | -1.778936 |
| 1 | -0.942075 | -0.013834 | -0.565226 |
| 1 | -5.410193 | -0.048189 | 5.319923  |
| 1 | -6.042864 | -0.053040 | 7.724774  |
| 1 | -4.295769 | -0.039947 | 9.492976  |
| 1 | -1.888599 | -0.021725 | 8.883023  |
| 1 | -1.997655 | -0.021993 | 2.162267  |
| 1 | 0.876411  | -0.000653 | 5.847638  |

## FIRST SINGLET EXCITED ELECTRONIC STATE

### KK

|   |           |           |           |
|---|-----------|-----------|-----------|
| 6 | 2.235959  | 0.104934  | -3.397682 |
| 6 | 2.226239  | 0.063194  | -1.977226 |
| 6 | 3.453871  | 0.073018  | -1.277759 |
| 6 | 4.646008  | 0.123768  | -2.010530 |
| 6 | 4.640536  | 0.164375  | -3.405750 |
| 6 | 3.428209  | 0.155742  | -4.131785 |
| 7 | 0.934428  | 0.085741  | -3.833553 |
| 6 | 0.074076  | 0.032591  | -2.746352 |
| 6 | 0.840230  | 0.016013  | -1.533053 |
| 1 | 3.454100  | 0.041303  | -0.191989 |
| 1 | 5.601246  | 0.131915  | -1.484052 |
| 1 | 5.585511  | 0.203440  | -3.946901 |
| 1 | 3.416917  | 0.187195  | -5.218282 |
| 6 | -3.461940 | -0.029563 | -3.673184 |
| 6 | -3.471670 | -0.070961 | -2.252729 |
| 6 | -4.663905 | -0.122432 | -1.518633 |
| 6 | -5.876205 | -0.132118 | -2.244714 |
| 6 | -5.881668 | -0.091812 | -3.639937 |
| 6 | -4.689543 | -0.040366 | -4.372696 |
| 6 | -2.075942 | 0.018341  | -4.117327 |
| 6 | -1.309806 | 0.002604  | -2.904000 |
| 7 | -2.170167 | -0.050487 | -1.816811 |
| 1 | -4.652622 | -0.153633 | -0.432130 |
| 1 | -6.821170 | -0.171750 | -1.703584 |
| 1 | -6.836887 | -0.100753 | -4.166437 |
| 1 | -4.689764 | -0.008913 | -5.458473 |
| 8 | -1.600360 | 0.064593  | -5.301589 |
| 8 | 0.364658  | -0.030417 | -0.348792 |
| 1 | 0.541200  | 0.102565  | -4.768047 |
| 1 | -1.776926 | -0.068378 | -0.882344 |

### KE

|   |           |           |           |
|---|-----------|-----------|-----------|
| 6 | 2.239894  | 0.103342  | -3.408851 |
| 6 | 2.223846  | 0.052565  | -1.969165 |
| 6 | 3.460516  | 0.059413  | -1.281770 |
| 6 | 4.644425  | 0.114570  | -2.013271 |
| 6 | 4.643989  | 0.163493  | -3.411481 |
| 6 | 3.432354  | 0.158250  | -4.126069 |
| 7 | 0.941882  | 0.086048  | -3.839149 |
| 6 | 0.089157  | 0.026274  | -2.744697 |
| 6 | 0.863047  | 0.005340  | -1.589913 |
| 1 | 3.477751  | 0.021872  | -0.196072 |
| 1 | 5.597083  | 0.119838  | -1.483457 |
| 1 | 5.587106  | 0.206017  | -3.952959 |
| 1 | 3.420190  | 0.196014  | -5.212801 |
| 6 | -3.433712 | -0.029608 | -3.685483 |
| 6 | -3.409981 | -0.078465 | -2.259950 |
| 6 | -4.595701 | -0.134045 | -1.520072 |
| 6 | -5.829534 | -0.140661 | -2.227377 |
| 6 | -5.854016 | -0.092999 | -3.620138 |
| 6 | -4.673029 | -0.036962 | -4.376572 |
| 6 | -2.058183 | 0.020070  | -4.115777 |
| 6 | -1.320294 | -0.004975 | -2.862516 |
| 7 | -2.110967 | -0.062913 | -1.767559 |
| 1 | -4.561010 | -0.170853 | -0.433972 |

|   |           |           |           |
|---|-----------|-----------|-----------|
| 1 | -6.767706 | -0.183564 | -1.673211 |
| 1 | -6.818003 | -0.099530 | -4.133599 |
| 1 | -4.696385 | 0.000110  | -5.462547 |
| 8 | -1.534879 | 0.073363  | -5.281072 |
| 8 | 0.326443  | -0.052055 | -0.330709 |
| 1 | -0.649791 | -0.070706 | -0.494083 |
| 1 | 0.519789  | 0.108061  | -4.765242 |

### EE

|   |           |           |           |
|---|-----------|-----------|-----------|
| 6 | 2.177360  | 0.097879  | -3.411794 |
| 6 | 2.210972  | 0.050476  | -1.968075 |
| 6 | 3.446384  | 0.058279  | -1.276436 |
| 6 | 4.629520  | 0.112876  | -2.024126 |
| 6 | 4.600735  | 0.158858  | -3.421654 |
| 6 | 3.385695  | 0.152193  | -4.132210 |
| 7 | 0.896784  | 0.082203  | -3.901723 |
| 6 | 0.094851  | 0.025328  | -2.799988 |
| 6 | 0.854038  | 0.004063  | -1.595691 |
| 1 | 3.470603  | 0.022577  | -0.190027 |
| 1 | 5.591029  | 0.119746  | -1.509660 |
| 1 | 5.540670  | 0.200806  | -3.972999 |
| 1 | 3.364862  | 0.187974  | -5.218525 |
| 6 | -3.429773 | -0.033244 | -3.678482 |
| 6 | -3.396320 | -0.080510 | -2.234813 |
| 6 | -4.604738 | -0.134596 | -1.514483 |
| 6 | -5.819716 | -0.141167 | -2.225234 |
| 6 | -5.848341 | -0.095321 | -3.622735 |
| 6 | -4.665078 | -0.040953 | -4.370333 |
| 6 | -2.072752 | 0.012939  | -4.050684 |
| 6 | -1.313657 | -0.008282 | -2.846255 |
| 7 | -2.115745 | -0.064955 | -1.744702 |
| 1 | -4.584035 | -0.170271 | -0.428166 |
| 1 | -6.759728 | -0.182936 | -1.674002 |
| 1 | -6.809796 | -0.102117 | -4.137303 |
| 1 | -4.689142 | -0.005359 | -5.456746 |
| 8 | -1.500445 | 0.068055  | -5.277602 |
| 1 | -0.520077 | 0.086288  | -5.094381 |
| 8 | 0.281916  | -0.051283 | -0.368627 |
| 1 | -0.698425 | -0.069795 | -0.551682 |

### EEC

|   |           |           |           |
|---|-----------|-----------|-----------|
| 6 | 2.180724  | 0.203832  | -3.338645 |
| 6 | 2.248031  | -0.084983 | -1.964748 |
| 6 | 3.476235  | -0.178068 | -1.268038 |
| 6 | 4.657763  | 0.040283  | -2.035577 |
| 6 | 4.597492  | 0.329312  | -3.387622 |
| 6 | 3.360634  | 0.422077  | -4.089176 |
| 7 | 0.867216  | 0.246251  | -3.802695 |
| 6 | 0.058788  | 0.002566  | -2.760104 |
| 6 | 0.882478  | -0.217685 | -1.580947 |
| 1 | 3.513767  | -0.407702 | -0.207854 |
| 1 | 5.631478  | -0.021167 | -1.546782 |
| 1 | 5.528266  | 0.490585  | -3.935006 |
| 1 | 3.312565  | 0.642251  | -5.150223 |
| 6 | -3.613115 | -0.073444 | -2.323371 |
| 6 | -3.367410 | -0.159455 | -3.746866 |
| 6 | -4.467938 | -0.237565 | -4.618400 |

|   |           |           |           |
|---|-----------|-----------|-----------|
| 6 | -5.761874 | -0.220725 | -4.105671 |
| 6 | -5.991433 | -0.125778 | -2.720637 |
| 6 | -4.927185 | -0.052268 | -1.826956 |
| 6 | -2.321219 | -0.017532 | -1.785126 |
| 6 | -1.391978 | -0.055304 | -2.853709 |
| 7 | -2.048851 | -0.148750 | -4.050538 |
| 1 | -4.288814 | -0.303175 | -5.689949 |
| 1 | -6.612129 | -0.279727 | -4.785123 |
| 1 | -7.014752 | -0.111618 | -2.345362 |
| 1 | -5.109108 | 0.017236  | -0.754849 |
| 8 | -2.029850 | 0.146423  | -0.405649 |
| 1 | -1.876324 | 1.090713  | -0.260124 |
| 8 | 0.495376  | -0.528707 | -0.333109 |
| 1 | -0.487345 | -0.439626 | -0.284361 |

### KKC

|   |           |           |           |
|---|-----------|-----------|-----------|
| 6 | 1.955918  | 0.123963  | -1.565552 |
| 6 | 2.419030  | -0.020706 | -2.875594 |
| 6 | 3.800216  | -0.061303 | -3.134675 |
| 6 | 4.683234  | 0.081254  | -2.047756 |
| 6 | 4.208519  | 0.248825  | -0.749676 |
| 6 | 2.824693  | 0.270748  | -0.469963 |
| 7 | 0.567433  | 0.063187  | -1.578352 |
| 6 | 0.106766  | 0.026829  | -2.926472 |
| 6 | 1.260347  | -0.097483 | -3.790598 |
| 1 | 4.152524  | -0.182551 | -4.154107 |
| 1 | 5.759870  | 0.063321  | -2.219514 |
| 1 | 4.918789  | 0.359568  | 0.069918  |
| 1 | 2.448715  | 0.380888  | 0.544143  |
| 6 | -3.533235 | 0.085764  | -3.675119 |
| 6 | -3.432200 | -0.146261 | -2.301227 |
| 6 | -4.558698 | -0.355230 | -1.486397 |
| 6 | -5.819253 | -0.303574 | -2.120450 |
| 6 | -5.934840 | -0.049356 | -3.484439 |
| 6 | -4.796867 | 0.154718  | -4.287429 |
| 6 | -2.174383 | 0.210838  | -4.243927 |
| 6 | -1.289673 | 0.021663  | -3.115028 |
| 7 | -2.090436 | -0.096749 | -1.942114 |
| 1 | -4.463642 | -0.533148 | -0.418122 |
| 1 | -6.720158 | -0.460317 | -1.526918 |
| 1 | -6.927716 | -0.011218 | -3.933562 |
| 1 | -4.867782 | 0.343857  | -5.353852 |
| 8 | -1.918108 | 0.457648  | -5.445273 |
| 8 | 1.333357  | -0.264849 | -5.030145 |
| 1 | 0.044194  | 0.656918  | -0.945063 |
| 1 | -1.748402 | -0.734196 | -1.232168 |

### KEC

|   |           |           |           |
|---|-----------|-----------|-----------|
| 6 | 0.024747  | -0.007146 | -0.028684 |
| 6 | 0.018803  | -0.007229 | 1.368780  |
| 6 | 1.226937  | 0.001973  | 2.131928  |
| 6 | 2.464707  | 0.011391  | 1.447634  |
| 6 | 2.463492  | 0.011425  | 0.051331  |
| 6 | 1.273605  | 0.002397  | -0.681355 |
| 6 | 0.855015  | -0.000812 | 3.506722  |
| 6 | -0.542166 | -0.011472 | 3.571579  |
| 7 | -1.018368 | -0.015287 | 2.257415  |

|   |           |           |           |
|---|-----------|-----------|-----------|
| 6 | -1.446302 | -0.018141 | 4.678541  |
| 7 | -2.783382 | -0.028046 | 4.498950  |
| 6 | -3.320053 | -0.032081 | 5.774983  |
| 6 | -2.301265 | -0.024522 | 6.780851  |
| 6 | -1.056075 | -0.015163 | 6.076535  |
| 6 | -2.655792 | -0.027251 | 8.149134  |
| 6 | -4.015515 | -0.037407 | 8.487136  |
| 6 | -5.009969 | -0.044758 | 7.506816  |
| 6 | -4.669753 | -0.042152 | 6.132058  |
| 8 | 0.153371  | -0.006204 | 6.540347  |
| 8 | 1.711218  | 0.005774  | 4.547956  |
| 1 | 3.393614  | 0.018459  | 2.010138  |
| 1 | 3.413625  | 0.018670  | -0.483230 |
| 1 | 1.308956  | 0.002706  | -1.769642 |
| 1 | -0.906161 | -0.014220 | -0.591014 |
| 1 | -5.435124 | -0.047823 | 5.358766  |
| 1 | -6.059266 | -0.052586 | 7.802918  |
| 1 | -4.305999 | -0.039623 | 9.539415  |
| 1 | -1.884347 | -0.021531 | 8.915301  |
| 1 | -2.008303 | -0.022118 | 2.078210  |
| 1 | 1.130998  | 0.001338  | 5.410285  |

### EK

|   |           |           |           |
|---|-----------|-----------|-----------|
| 6 | -0.003179 | -0.006880 | -0.050589 |
| 6 | 0.056754  | -0.006555 | 1.376703  |
| 6 | 1.251618  | 0.002470  | 2.084468  |
| 6 | 2.502656  | 0.012049  | 1.414909  |
| 6 | 2.458608  | 0.011850  | -0.010488 |
| 6 | 1.261033  | 0.002804  | -0.702389 |
| 6 | 0.909199  | -0.000290 | 3.512257  |
| 6 | -0.529892 | -0.011262 | 3.582406  |
| 7 | -0.988450 | -0.014659 | 2.293880  |
| 6 | -1.423962 | -0.018078 | 4.690285  |
| 7 | -2.788772 | -0.028317 | 4.493029  |
| 6 | -3.310404 | -0.032324 | 5.736779  |
| 6 | -2.287837 | -0.024711 | 6.767323  |
| 6 | -1.069954 | -0.015519 | 6.059900  |
| 6 | -2.650793 | -0.027530 | 8.125027  |
| 6 | -3.992456 | -0.037632 | 8.473754  |
| 6 | -4.992975 | -0.045081 | 7.475905  |
| 6 | -4.662963 | -0.042511 | 6.128150  |
| 8 | 0.173828  | -0.006229 | 6.603619  |
| 8 | 1.720027  | 0.005799  | 4.498736  |
| 1 | 3.433647  | 0.019096  | 1.968794  |
| 1 | 3.391990  | 0.019001  | -0.575218 |
| 1 | 1.286292  | 0.003095  | -1.793964 |
| 1 | -0.941906 | -0.013957 | -0.593200 |
| 1 | -5.436505 | -0.048270 | 5.361925  |
| 1 | -6.041669 | -0.052979 | 7.773055  |
| 1 | -4.282261 | -0.039880 | 9.524023  |
| 1 | -1.878757 | -0.021784 | 8.892603  |
| 1 | -1.978792 | -0.021971 | 2.111477  |
| 1 | 0.837124  | -0.001180 | 5.846649  |

## CONICAL INTERSECTIONS

### CI<sub>DPT</sub>

|   |           |           |           |
|---|-----------|-----------|-----------|
| 7 | 0.155669  | 0.040517  | 0.052534  |
| 6 | 0.060203  | 0.018472  | 1.403704  |
| 6 | 1.368496  | -0.035765 | 1.935561  |
| 6 | 2.325584  | -0.045095 | 0.820972  |
| 6 | 1.529418  | 0.004003  | -0.324291 |
| 6 | -1.053524 | 0.040779  | 2.247844  |
| 6 | -0.839189 | 0.008691  | 3.614944  |
| 6 | 0.454222  | -0.044619 | 4.152662  |
| 6 | 1.555426  | -0.066603 | 3.308511  |
| 8 | 3.607955  | -0.091437 | 0.922336  |
| 6 | 1.915943  | 0.001162  | -1.683280 |
| 7 | 3.156722  | -0.041417 | -2.158624 |
| 6 | 3.233404  | 0.103778  | -3.610663 |
| 6 | 1.978221  | 0.166345  | -4.074680 |
| 6 | 1.044791  | 0.125788  | -2.853172 |
| 6 | 1.615349  | 0.065365  | -5.420922 |
| 6 | 2.740300  | -0.190924 | -6.296824 |
| 6 | 4.024722  | -0.220186 | -5.839698 |
| 6 | 4.489144  | -0.039084 | -4.459127 |
| 8 | -0.194233 | 0.146495  | -2.838986 |
| 1 | 0.598367  | 0.092776  | -5.759130 |
| 1 | 2.549818  | -0.390654 | -7.344008 |
| 1 | 4.794257  | -0.393704 | -6.589791 |
| 1 | 5.198296  | 0.809270  | -4.377971 |
| 1 | -2.050173 | 0.081729  | 1.846168  |
| 1 | -1.686360 | 0.025105  | 4.279367  |
| 1 | 0.586337  | -0.068430 | 5.219987  |
| 1 | 2.556148  | -0.107467 | 3.697023  |
| 1 | -0.576382 | 0.076797  | -0.612840 |
| 1 | 3.942034  | -0.115768 | -1.555790 |

### CI<sub>IRI</sub>

|   |           |           |           |
|---|-----------|-----------|-----------|
| 6 | 2.236007  | 0.666488  | -3.169060 |
| 6 | 2.302586  | -0.256996 | -2.138742 |
| 6 | 3.587716  | -0.631649 | -1.556636 |
| 6 | 4.715319  | -0.051647 | -2.181083 |
| 6 | 4.640633  | 0.872926  | -3.195741 |
| 6 | 3.364358  | 1.379948  | -3.720902 |
| 7 | 0.907209  | 0.811235  | -3.526307 |
| 6 | 0.103107  | -0.006875 | -2.723580 |
| 6 | 0.949481  | -0.652026 | -1.881505 |
| 1 | 3.673126  | -1.421859 | -0.834586 |
| 1 | 5.699121  | -0.339857 | -1.824399 |
| 1 | 5.558923  | 1.280274  | -3.599734 |
| 1 | 3.317128  | 1.655981  | -4.771429 |
| 6 | -3.547715 | -0.569029 | -3.448477 |
| 6 | -3.488242 | 0.484579  | -2.532537 |
| 6 | -4.639924 | 1.108386  | -2.085829 |
| 6 | -5.861631 | 0.660470  | -2.574184 |
| 6 | -5.925638 | -0.391449 | -3.493202 |
| 6 | -4.767342 | -1.013322 | -3.937974 |
| 6 | -2.157201 | -0.965474 | -3.690359 |
| 6 | -1.366528 | -0.043583 | -2.844069 |
| 7 | -2.151356 | 0.774929  | -2.182295 |
| 1 | -4.577528 | 1.917352  | -1.383437 |

|   |           |           |           |
|---|-----------|-----------|-----------|
| 1 | -6.771416 | 1.128517  | -2.242492 |
| 1 | -6.883839 | -0.718958 | -3.855765 |
| 1 | -4.806270 | -1.821560 | -4.644247 |
| 8 | -1.766228 | -1.883331 | -4.440919 |
| 8 | 0.584735  | -1.577051 | -0.898048 |
| 1 | -0.345663 | -1.539972 | -0.714828 |
| 1 | 0.571352  | 1.500864  | -4.147161 |

### Cl<sub>IR2</sub>

|   |          |          |          |
|---|----------|----------|----------|
| 7 | -0.74092 | 0.02709  | -0.04543 |
| 6 | -0.07252 | 0.27854  | 1.12917  |
| 6 | 1.09075  | -0.54623 | 1.1876   |
| 6 | 1.05469  | -1.46718 | 0.1003   |
| 6 | -0.10111 | -1.02223 | -0.88208 |
| 6 | -0.44855 | 1.09294  | 2.17924  |
| 6 | 0.31679  | 1.01415  | 3.4107   |
| 6 | 1.40544  | 0.17891  | 3.49835  |
| 6 | 1.83723  | -0.60022 | 2.41094  |
| 8 | 1.88966  | -2.39111 | -0.16338 |
| 6 | 0.73314  | -0.39883 | -1.87164 |
| 7 | 1.72482  | -1.12893 | -2.48346 |
| 6 | 2.40543  | -0.40529 | -3.44569 |
| 6 | 1.79787  | 0.85767  | -3.54429 |
| 6 | 0.73066  | 0.92267  | -2.54785 |
| 6 | 2.27495  | 1.78167  | -4.45958 |
| 6 | 3.35578  | 1.43693  | -5.26924 |
| 6 | 3.94929  | 0.18326  | -5.16023 |
| 6 | 3.47512  | -0.75822 | -4.24174 |
| 8 | -0.07316 | 1.8817   | -2.41574 |
| 1 | 1.81134  | 2.74744  | -4.5316  |
| 1 | 3.73701  | 2.14539  | -5.9838  |
| 1 | 4.78597  | -0.06799 | -5.78809 |
| 1 | 3.93329  | -1.72577 | -4.15528 |
| 1 | -1.31253 | 1.73166  | 2.10606  |
| 1 | -0.00483 | 1.58389  | 4.26943  |
| 1 | 1.95247  | 0.12258  | 4.4308   |
| 1 | 2.69055  | -1.24813 | 2.4912   |
| 1 | -1.68497 | 0.28322  | -0.17221 |
| 1 | 2.02787  | -1.96768 | -2.02356 |

For all the geometries given above the first column corresponds to the atomic number and the three following columns respectively to the  $x$ ,  $y$  and  $z$  Cartesian coordinates in Å.
